# Supplementary material
Source: publisher site journal article supplement (https://www.dovepress.com/get_supplementary_file.php?f=314478.docx)
Supplement: Supplementary file 1 [file get_supplementary_file.php]

**Supplementary materials**

**Supplementary Table 1: Comparison of the viability of the periodontal ligament cells between different time intervals within the group using Post-Hoc Bonferroni test**

|  | **1 hr v/s 24 hrs** | | **1 hr v/s 48 hrs** | | **24 hrs v/s 48 hrs** | |
| --- | --- | --- | --- | --- | --- | --- |
| **Groups** | **Mean diff** | **p value** | **Mean diff** | **p value** | **Mean diff** | **p value** |
| DMEM | -.65650 | .005 | -.88037 | .006* | -.22387 | .041* |
| HBSS | .34813 | .018* | .34173 | .019* | -.00640 | .094 |
| CORNISOL | -.71973 | .006* | -.71933 | .022* | .00040 | .996 |
| MK | -.58663 | .011 | -.75773 | .011* | -.17110 | .191 |
| DISTILLED WATER | -.01023 | .255 | .00187 | .474 | .01210 | .115 |

*denotes statistically significant with p<0.05

Dulbecco's Modified Eagle Medium (DMEM), MK (Mc Carey Kaufman media), Hanks Balanced Salt Solution (HBSS)

**Supplementary Table 2: Comparison of the viability of the periodontal ligament cells at different time intervals within the group using ANOVA**

| Time intervals | Groups | Min | Max | Mean | SD | F Value | p value |
| --- | --- | --- | --- | --- | --- | --- | --- |
| 1 hr | DMEM | 1.1320 | 1.2673 | 1.1914 | 0.0691 | 297.34 | <0.001* |
| HBSS | .2849 | .4476 | 0.3665 | 0.0814 |
| CORNISOL | 1.1767 | 1.2746 | 1.2399 | 0.0548 |
| MK | 1.2540 | 1.3714 | 1.3146 | 0.0588 |
| DISTILLED WATER | .0094 | .0159 | 0.0122 | 0.0033 |
|  | | | | | | | |
| 24 hrs | DMEM | 1.8345 | 1.8554 | 1.8479 | 0.0116 | 2257.2 | <0.001* |
| HBSS | .0178 | .0196 | 0.0184 | 0.0010 |
| CORNISOL | 1.8896 | 2.0186 | 1.9596 | 0.0652 |
| MK | 1.8422 | 1.9319 | 1.9012 | 0.0511 |
| DISTILLED WATER | .0175 | .0323 | 0.0225 | 0.0085 |
|  | | | | | | | |
| 48 hrs | DMEM | 1.9887 | 2.1471 | 2.0718 | 0.0795 | 463.8 | <0.001* |
| HBSS | .0200 | .0276 | 0.0248 | 0.0042 |
| CORNISOL | 1.8445 | 2.1096 | 1.9592 | 0.1361 |
| MK | 1.9326 | 2.1476 | 2.0723 | 0.1211 |
| DISTILLED WATER | .0096 | .0112 | 0.0104 | 0.0008 |

*denotes statistically significant with p<0.05

Dulbecco's Modified Eagle Medium (DMEM), MK (Mc Carey Kaufman media), Hanks Balanced Salt Solution (HBSS)

**Supplementary Table 3: Comparison of the viability of the periodontal ligament cells between different groups at each interval using Post-Hoc Bonferroni test**

| Groups | Intergroup Comparision | 1 hr | | 24 hrs | | 48 hrs | |
| --- | --- | --- | --- | --- | --- | --- | --- |
|  |  | Mean diff | p value | Mean diff | p value | Mean diff | p value |
| DMEM | HBSS | .8248 | .000* | 1.829 | .000* | 2.046 | <0.001* |
| CORNISOL | -.0484 | 1.000 | -.1117 | .046* | .1125 | 1.000 |
| MK | -.1232 | .302 | -.0533 | 1.000 | -.0006 | 1.000 |
| DISTILLED WATER | 1.179 | .000* | 1.825 | .000* | 2.061 | <0.001* |
| HBSS | CORNISOL | -.8733 | .000* | -1.941 | .000* | -1.934 | <0.001* |
| MK | -.9480 | .000* | -1.882 | .000* | -2.047 | <0.001* |
| DISTILLED WATER | .3543 | .000* | -.0040 | 1.000 | .0144 | 1.000 |
| CORNISOL | MK | -.0747 | 1.000 | .0583 | .866 | -.1131 | 1.000 |
| DISTILLED WATER | 1.227 | .000* | 1.937 | .000* | 1.948 | <0.001* |
| MK | DISTILLED WATER | 1.302 | .000* | 1.878 | .000* | 2.061 | <0.001* |

*denotes statistically significant with p<0.05

Dulbecco's Modified Eagle Medium (DMEM), MK (Mc Carey Kaufman media), Hanks Balanced Salt Solution (HBSS)
